# Supplementary material for: Continuous vs Routine Electroencephalogram in Critically Ill Adults With Altered Consciousness and No Recent Seizure: A Multicenter Randomized Clinical Trial
Source: PubMed Central journal article supplement (PMC7385681; doi:10.1001/jamaneurol.2020.2264), 2020-07-27

## Supplementary Online Content

Rossetti AO, Schindler K, Sutter R, et al. Continuous vs routine electroencephalogram in critically ill adults with altered consciousness and no recent seizure: a randomized clinical trial. Published online July 13, 2020. *JAMA Neurol*. doi:10.1001/jamaneurol.2020.2264

**eTable 1.** Exploratory analysis of primary outcome (mortality at 6 months) and functional outcomes

**eFigure 1.** Study design

**eFigure 2.** Cerebral performance categories (CPC) and modified Rankin Scales (mRS) at 6 months in the two intervention groups

This supplementary material has been provided by the authors to give readers additional information about their work.

**Table S1:** Exploratory analysis of primary outcome (mortality at 6 months) and functional outcomes across cEEG versus rEEG in patients with and without hypoxic-ischemic encephalopathy. (Poisson regression models for categorical variables [mortality] and linear regression models for continuous variables [ $\Delta$  mRS and CPC]). Bold values are significant.

| Patients with hypoxic-ischemic encephalopathy          | rEEG<br>(n=52)  | cEEG<br>(n=60)  | Crude             |            |              | Adjusted for CCI  |            |              |
|--------------------------------------------------------|-----------------|-----------------|-------------------|------------|--------------|-------------------|------------|--------------|
|                                                        | Number          | Number          | Relative risk     | 95% CI     | p-value      | Relative risk     | 95% CI     | p-value      |
| <b>Mortality at 6 months</b>                           | 29 (55.8%)      | 39 (65.0%)      | 1.16              | 0.86-1.58  | 0.327        | 1.28              | 0.94-1.75  | 0.122        |
|                                                        | median (range)  | median (range)  | Regression coeff. | 95% CI     | p-value      | Regression coeff. | 95% CI     | p-value      |
| <b><math>\Delta</math> mRS at 6 Months (survivors)</b> | 1 (-1 – 4)      | 1 (-1 – 4)      | 0.39              | -0.45-1.22 | 0.355        | 0.34              | -0.52-1.20 | 0.432        |
| <b>CPC at 6 Months (survivors)</b>                     | 1 (1-3)         | 2 (1-3)         | 0.15              | -0.37-0.68 | 0.560        | 0.21              | -0.32-0.75 | 0.428        |
| Patients without hypoxic-ischemic encephalopathy       | rEEG<br>(n=130) | cEEG<br>(n=122) | Crude             |            |              | Adjusted for CCI  |            |              |
|                                                        | Number          | Number          | Relative risk     | 95% CI     | p-value      | Relative risk     | 95% CI     | p-value      |
| <b>Mortality at 6 months</b>                           | 59 (45.4%)      | 50 (41.0%)      | 0.90              | 0.68-1.20  | 0.483        | 0.90              | 0.68-1.20  | 0.466        |
|                                                        | median (range)  | median (range)  | Regression coeff. | 95% CI     | p-value      | Regression coeff. | 95% CI     | p-value      |
| <b><math>\Delta</math> mRS at 6 Months (survivors)</b> | 1 (-5 – 4)      | 1 (-3 – 5)      | 0.73              | 0.10-1.36  | <b>0.023</b> | 0.74              | 0.12-1.35  | <b>0.019</b> |
| <b>CPC at 6 Months (survivors)</b>                     | 2 (1-4)         | 2 (1-4)         | 0.06              | -0.24-0.35 | 0.710        | 0.06              | -0.24-0.35 | 0.706        |

Legend: rEEG = routine electroencephalography; cEEG = continuous electroencephalography; CCI = Charlson comorbidity index; CI = confidence interval; CPC = Cerebral Performance Category;  $\Delta$  mRS = evolution of modified Rankin Scale between pre-hospitalization and at 6 months.

**Figure S1:** Study design. cEEG=continuous EEG; rEEG=routine EEG.

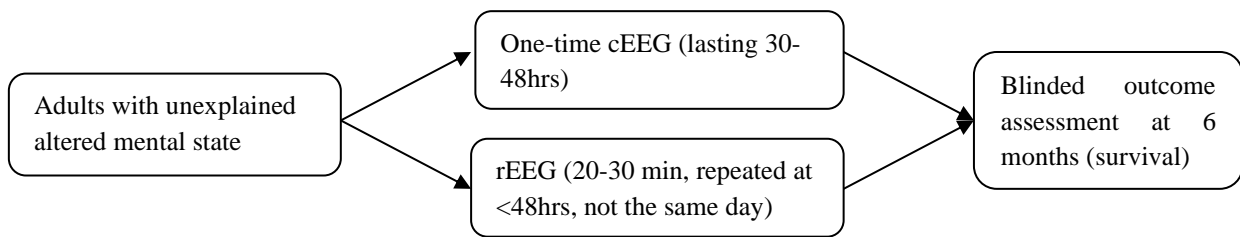

**Figure S2:** Cerebral performance categories (CPC) and modified Rankin Scales (mRS) at 6 months in the two intervention groups.

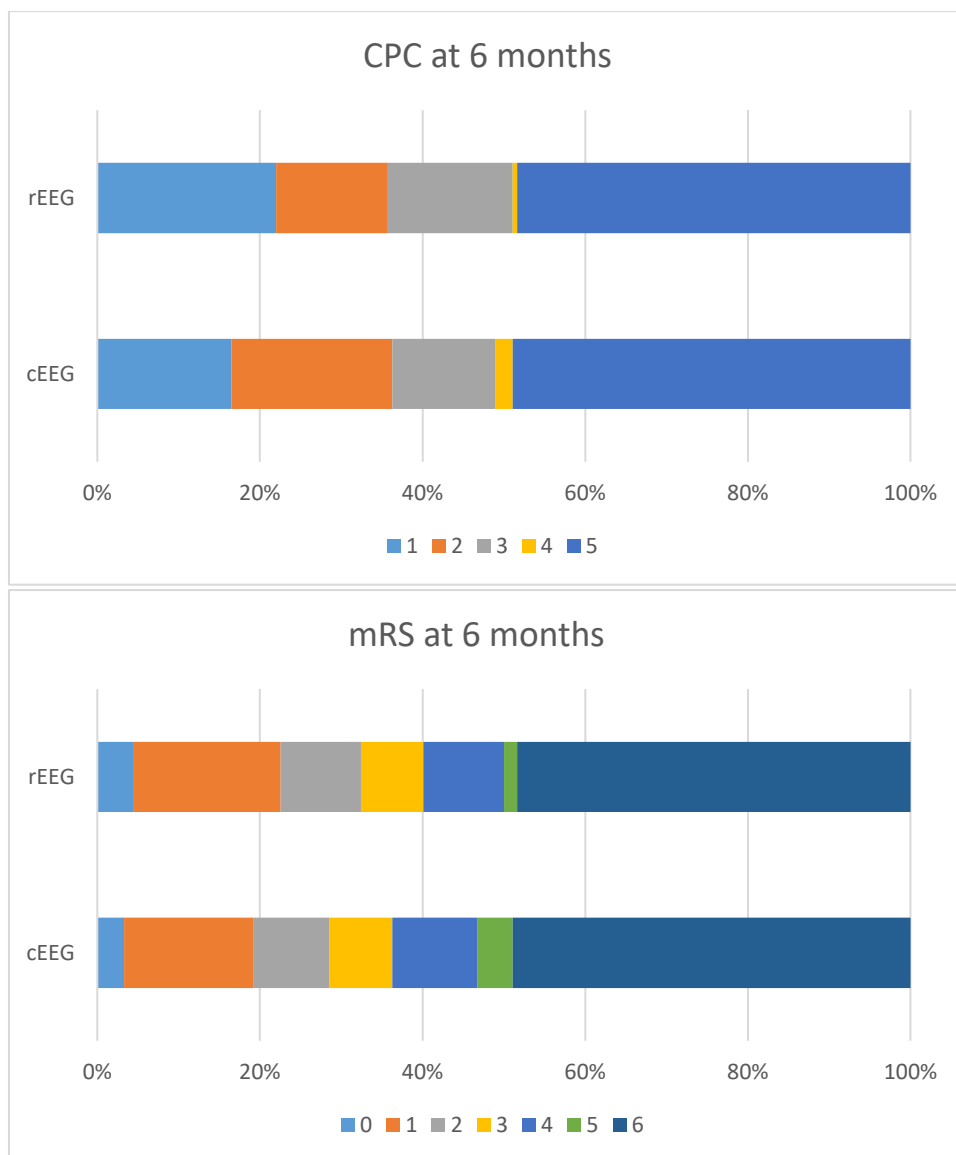

Supplement: jamaneurol-e202264-s002.pdf [file jamaneurol-e202264-s002.pdf]
