# Supplementary material for: Continuous vs Routine Electroencephalogram in Critically Ill Adults With Altered Consciousness and No Recent Seizure: A Multicenter Randomized Clinical Trial
Source: PubMed Central journal article supplement (PMC7385681; doi:10.1001/jamaneurol.2020.2264), 2020-07-27
Supplement: jamaneurol-e202264-s003.pdf [file jamaneurol-e202264-s003.pdf]

## Data Sharing Statement

### Data

**Data available:** Yes

**Data types:** Deidentified participant data

**How to access data:** [andrea.rossetti@chuv.ch](mailto:andrea.rossetti@chuv.ch)

**When available:** With publication

### Supporting Documents

**Document types:** None

### Additional Information

**Who can access the data:** qualified researchers whose proposed use of the data has been approved

**Types of analyses:** any purpose related to the aim of the study

**Mechanisms of data availability:** signed data access agreement (also including IRB approval)

**Any additional restrictions:** None
